# Supplementary material for: The Inhibitory Response to PI3K/AKT Pathway Inhibitors MK-2206 and Buparlisib Is Related to Genetic Differences in Pancreatic Ductal Adenocarcinoma Cell Lines
Source: MDPI journal article supplement (doi:10.3390/ijms23084295), 2022-04-13
Supplement: s1 [file s1]

Table S1 - Cell Viability MK-2206 (to 100%Control)

|                    |         |         |         |         |        |                       |
|--------------------|---------|---------|---------|---------|--------|-----------------------|
| AsPc-1             |         |         |         |         |        |                       |
| Proliferation      |         |         |         |         |        |                       |
| Concentration      | 1st     | 2nd     | 3rd     | Mean    | SD     | P-value (vs. Control) |
| Control            | 100.00% | 100.00% | 100.00% | 100.00% | 0.00%  |                       |
| 1µM                | 62.86%  | 93.64%  | 72.03%  | 76.18%  | 15.80% | 0.05                  |
| 5µM                | 45.71%  | 68.21%  | 59.32%  | 57.75%  | 11.33% | 0.002                 |
| 10µM               | 21.43%  | 10.40%  | 15.68%  | 15.84%  | 5.52%  | <0.001                |
| Metabolic activity |         |         |         |         |        |                       |
| Concentration      | 1st     | 2nd     | 3rd     | Mean    | SD     | P-value (vs. Control) |
| Control            | 100.00% | 100.00% | 100.00% | 100.00% | 0.00%  |                       |
| 1µM                | 86.91%  | 94.75%  | 92.02%  | 91.23%  | 3.98%  | 0.04                  |
| 5µM                | 89.76%  | 89.36%  | 80.16%  | 86.43%  | 5.43%  | 0.004                 |
| 10µM               | 31.22%  | 35.06%  | 34.94%  | 33.74%  | 2.18%  | <0.001                |
| Biomass            |         |         |         |         |        |                       |
| Concentration      | 1st     | 2nd     | 3rd     | Mean    | SD     | P-value (vs. Control) |
| Control            | 100.00% | 100.00% | 100.00% | 100.00% | 0.00%  |                       |
| 1µM                | 66.25%  | 87.05%  | 83.65%  | 78.98%  | 11.16% | 0.08                  |
| 5µM                | 43.80%  | 71.54%  | 62.03%  | 59.12%  | 14.10% | 0.003                 |
| 10µM               | 18.32%  | 4.33%   | 22.79%  | 15.15%  | 9.63%  | <0.001                |

|                    |         |         |         |         |        |                       |
|--------------------|---------|---------|---------|---------|--------|-----------------------|
| BxPc-3             |         |         |         |         |        |                       |
| Proliferation      |         |         |         |         |        |                       |
| Concentration      | 1st     | 2nd     | 3rd     | Mean    | SD     | P-value (vs. Control) |
| Control            | 100.00% | 100.00% | 100.00% | 100.00% | 0.00%  |                       |
| 1µM                | 67.20%  | 62.85%  | 73.13%  | 67.73%  | 5.16%  | 0.005                 |
| 5µM                | 33.12%  | 62.01%  | 60.20%  | 51.78%  | 16.18% | <0.001                |
| 10µM               | 13.83%  | 8.38%   | 17.01%  | 13.07%  | 4.36%  | <0.001                |
| Metabolic activity |         |         |         |         |        |                       |
| Concentration      | 1st     | 2nd     | 3rd     | Mean    | SD     | P-value (vs. Control) |
| Control            | 100.00% | 100.00% | 100.00% | 100.00% | 0.00%  |                       |
| 1µM                | 99.66%  | 83.07%  | 94.81%  | 92.51%  | 8.53%  | 0.64                  |
| 5µM                | 71.68%  | 79.54%  | 87.73%  | 79.65%  | 8.03%  | 0.06                  |
| 10µM               | 20.50%  | 10.80%  | 38.40%  | 23.23%  | 14.00% | <0.001                |
| Biomass            |         |         |         |         |        |                       |
| Concentration      | 1st     | 2nd     | 3rd     | Mean    | SD     | P-value (vs. Control) |
| Control            | 100.00% | 100.00% | 100.00% | 100.00% | 0.00%  |                       |
| 1µM                | 72.75%  | 62.56%  | 68.64%  | 67.98%  | 5.13%  | <0.001                |
| 5µM                | 35.45%  | 38.83%  | 37.60%  | 37.29%  | 1.71%  | <0.001                |
| 10µM               | 20.02%  | 9.71%   | 15.15%  | 14.96%  | 5.16%  | <0.001                |

|                    |         |         |         |         |        |                       |
|--------------------|---------|---------|---------|---------|--------|-----------------------|
| Capan-1            |         |         |         |         |        |                       |
| Proliferation      |         |         |         |         |        |                       |
| Concentration      | 1st     | 2nd     | 3rd     | Mean    | SD     | P-value (vs. Control) |
| Control            | 100.00% | 100.00% | 100.00% | 100.00% | 0.00%  |                       |
| 1µM                | 94.12%  | 66.00%  | 96.88%  | 85.67%  | 17.09% | 0.21                  |
| 5µM                | 41.18%  | 36.00%  | 49.17%  | 42.12%  | 6.63%  | <0.001                |
| 10µM               | 15.69%  | 10.00%  | 15.00%  | 13.56%  | 3.11%  | <0.001                |
| Metabolic activity |         |         |         |         |        |                       |
| Concentration      | 1st     | 2nd     | 3rd     | Mean    | SD     | P-value (vs. Control) |
| Control            | 100.00% | 100.00% | 100.00% | 100.00% | 0.00%  |                       |
| 1µM                | 93.70%  | 93.92%  | 86.78%  | 91.47%  | 4.06%  | 0.18                  |
| 5µM                | 60.76%  | 61.32%  | 68.51%  | 63.53%  | 4.32%  | <0.001                |
| 10µM               | 41.22%  | 48.06%  | 45.94%  | 45.07%  | 3.50%  | <0.001                |
| Biomass            |         |         |         |         |        |                       |
| Concentration      | 1st     | 2nd     | 3rd     | Mean    | SD     | P-value (vs. Control) |
| Control            | 100.00% | 100.00% | 100.00% | 100.00% | 0.00%  |                       |
| 1µM                | 97.86%  | 80.42%  | 96.95%  | 91.74%  | 9.82%  | 0.24                  |
| 5µM                | 68.71%  | 73.64%  | 78.81%  | 73.72%  | 5.05%  | 0.001                 |
| 10µM               | 11.64%  | 15.12%  | 14.14%  | 13.63%  | 1.79%  | <0.001                |

| Colo357       |                    |         |         |         |         |         |        |                       |
|---------------|--------------------|---------|---------|---------|---------|---------|--------|-----------------------|
|               | Proliferation      |         |         |         |         |         |        |                       |
| Concentration | 1st                | 2nd     | 3rd     | 4th     | 5th     | Mean    | SD     | P-value (vs. Control) |
| Control       | 100.00%            | 100.00% | 100.00% | 100.00% | 100.00% | 100.00% | 0.00%  |                       |
| 1µM           | 74.43%             | 85.39%  | 100.44% | 81.05%  | 80.70%  | 84.40%  | 9.78%  | 0.02                  |
| 5µM           | 51.53%             | 46.07%  | 61.84%  | 77.02%  | 62.81%  | 59.85%  | 11.90% | <0.001                |
| 10µM          | 49.62%             | 47.19%  | 41.67%  | 42.34%  | 34.39%  | 43.04%  | 5.87%  | <0.001                |
|               | Metabolic activity |         |         |         |         |         |        |                       |
| Concentration | 1st                | 2nd     | 3rd     | 4th     | 5th     | Mean    | SD     | P-value (vs. Control) |
| Control       | 100.00%            | 100.00% | 100.00% | 100.00% | 100.00% | 100.00% | 0.00%  |                       |
| 1µM           | 124.04%            | 101.23% | 108.63% | 102.41% | 82.94%  | 103.85% | 14.80% | 0.92                  |
| 5µM           | 52.80%             | 69.86%  | 79.38%  | 63.75%  | 68.21%  | 66.80%  | 9.68%  | 0.005                 |
| 10µM          | 54.86%             | 33.18%  | 60.54%  | 66.95%  | 46.55%  | 52.42%  | 13.11% | <0.001                |
|               | Biomass            |         |         |         |         |         |        |                       |
| Concentration | 1st                | 2nd     | 3rd     | 4th     |         | Mean    | SD     | P-value (vs. Control) |
| Control       | 100.00%            | 100.00% | 100.00% | 100.00% |         | 100.00% | 0.00%  |                       |
| 1µM           | 87.05%             | 94.81%  | 89.31%  | 60.01%  |         | 82.80%  | 15.54% | 0.17                  |
| 5µM           | 71.54%             | 60.24%  | 79.77%  | 37.69%  |         | 62.31%  | 18.26% | 0.002                 |
| 10µM          | 18.32%             | 45.17%  | 37.07%  | 23.64%  |         | 31.05%  | 12.28% | <0.001                |

| Panc-1        |                    |         |         |  |  |         |       |                       |
|---------------|--------------------|---------|---------|--|--|---------|-------|-----------------------|
|               | Proliferation      |         |         |  |  |         |       |                       |
| Concentration | 1st                | 2nd     | 3rd     |  |  | Mean    | SD    | P-value (vs. Control) |
| Control       | 100.00%            | 100.00% | 100.00% |  |  | 100.00% | 0.00% |                       |
| 1µM           | 71.65%             | 62.96%  | 59.67%  |  |  | 64.76%  | 6.19% | <0.001                |
| 5µM           | 65.35%             | 53.70%  | 53.33%  |  |  | 57.46%  | 6.84% | <0.001                |
| 10µM          | 26.77%             | 27.78%  | 20.67%  |  |  | 25.07%  | 3.85% | <0.001                |
|               | Metabolic activity |         |         |  |  |         |       |                       |
| Concentration | 1st                | 2nd     | 3rd     |  |  | Mean    | SD    | P-value (vs. Control) |
| Control       | 100.00%            | 100.00% | 100.00% |  |  | 100.00% | 0.00% |                       |
| 1µM           | 80.15%             | 73.64%  | 88.84%  |  |  | 80.88%  | 7.63% | 0.01                  |
| 5µM           | 71.62%             | 65.79%  | 83.97%  |  |  | 73.79%  | 9.28% | 0.002                 |
| 10µM          | 48.76%             | 49.25%  | 43.66%  |  |  | 47.22%  | 3.10% | <0.001                |
|               | Biomass            |         |         |  |  |         |       |                       |
| Concentration | 1st                | 2nd     | 3rd     |  |  | Mean    | SD    | P-value (vs. Control) |
| Control       | 100.00%            | 100.00% | 100.00% |  |  | 100.00% | 0.00% |                       |
| 1µM           | 63.16%             | 66.58%  | 61.29%  |  |  | 63.68%  | 2.68% | <0.001                |
| 5µM           | 56.93%             | 55.81%  | 56.24%  |  |  | 56.33%  | 0.57% | <0.001                |
| 10µM          | 24.52%             | 37.13%  | 29.22%  |  |  | 30.29%  | 6.37% | <0.001                |

| PaTu8902      |                    |         |         |         |         |         |        |                       |
|---------------|--------------------|---------|---------|---------|---------|---------|--------|-----------------------|
|               | Proliferation      |         |         |         |         |         |        |                       |
| Concentration | 1st                | 2nd     | 3rd     | 4th     |         | Mean    | SD     | P-value (vs. Control) |
| Control       | 100.00%            | 100.00% | 100.00% | 100.00% |         | 100.00% | 0.00%  |                       |
| 1µM           | 69.66%             | 78.00%  | 78.85%  | 71.00%  |         | 74.38%  | 4.72%  | 0.004                 |
| 5µM           | 59.10%             | 62.00%  | 39.42%  | 56.61%  |         | 54.28%  | 10.15% | <0.001                |
| 10µM          | 24.27%             | 15.00%  | 10.58%  | 41.96%  |         | 22.95%  | 13.90% | <0.001                |
|               | Metabolic activity |         |         |         |         |         |        |                       |
| Concentration | 1st                | 2nd     | 3rd     | 4th     |         | Mean    | SD     | P-value (vs. Control) |
| Control       | 100.00%            | 100.00% | 100.00% | 100.00% |         | 100.00% | 0.00%  |                       |
| 1µM           | 89.77%             | 83.76%  | 81.42%  | 77.92%  |         | 83.22%  | 4.98%  | 0.69                  |
| 5µM           | 71.12%             | 71.00%  | 73.68%  | 74.62%  |         | 72.61%  | 1.83%  | 0.05                  |
| 10µM          | 21.78%             | 42.64%  | 40.15%  | 29.58%  |         | 33.54%  | 9.67%  | <0.001                |
|               | Biomass            |         |         |         |         |         |        |                       |
| Concentration | 1st                | 2nd     | 3rd     | 4th     | 5th     | Mean    | SD     | P-value (vs. Control) |
| Control       | 100.00%            | 100.00% | 100.00% | 100.00% | 100.00% | 100.00% | 0.00%  |                       |
| 1µM           | 63.26%             | 61.97%  | 54.82%  | 69.43%  | 56.63%  | 61.22%  | 5.79%  | <0.001                |
| 5µM           | 58.76%             | 50.78%  | 24.17%  | 49.86%  | 53.47%  | 47.41%  | 13.44% | <0.001                |
| 10µM          | 23.45%             | 37.28%  | 19.93%  | 47.25%  | 45.01%  | 34.58%  | 12.40% | <0.001                |

| PaTu8988S     |                    |         |         |         |  |         |        |                       |
|---------------|--------------------|---------|---------|---------|--|---------|--------|-----------------------|
|               | Proliferation      |         |         |         |  |         |        |                       |
| Concentration | 1st                | 2nd     | 3rd     | 4th     |  | Mean    | SD     | P-value (vs. Control) |
| Control       | 100.00%            | 100.00% | 100.00% | 100.00% |  | 100.00% | 0.00%  |                       |
| 1µM           | 86.44%             | 84.30%  | 81.52%  | 79.07%  |  | 82.83%  | 3.22%  | <0.001                |
| 5µM           | 33.90%             | 43.60%  | 51.09%  | 43.02%  |  | 42.90%  | 7.04%  | <0.001                |
| 10µM          | 8.47%              | 7.75%   | 17.39%  | 18.60%  |  | 13.05%  | 5.74%  | <0.001                |
|               | Metabolic activity |         |         |         |  |         |        |                       |
| Concentration | 1st                | 2nd     | 3rd     |         |  | Mean    | SD     | P-value (vs. Control) |
| Control       | 100.00%            | 100.00% | 100.00% |         |  | 100.00% | 0.00%  |                       |
| 1µM           | 92.35%             | 91.65%  | 88.54%  |         |  | 90.85%  | 2.03%  | 0.62                  |
| 5µM           | 63.25%             | 80.71%  | 58.50%  |         |  | 67.49%  | 11.70% | 0.005                 |
| 10µM          | 49.68%             | 38.29%  | 34.60%  |         |  | 40.86%  | 7.86%  | <0.001                |
|               | Biomass            |         |         |         |  |         |        |                       |
| Concentration | 1st                | 2nd     | 3rd     | 4th     |  | Mean    | SD     | P-value (vs. Control) |
| Control       | 100.00%            | 100.00% | 100.00% | 100.00% |  | 100.00% | 0.00%  |                       |
| 1µM           | 56.92%             | 55.07%  | 50.78%  | 58.30%  |  | 55.27%  | 3.27%  | <0.001                |
| 5µM           | 45.04%             | 51.31%  | 40.51%  | 42.52%  |  | 44.85%  | 4.69%  | <0.001                |
| 10µM          | 30.52%             | 43.07%  | 33.45%  | 31.89%  |  | 34.73%  | 5.69%  | <0.001                |

| PaTu8988T     |                    |         |         |         |         |         |        |                       |
|---------------|--------------------|---------|---------|---------|---------|---------|--------|-----------------------|
|               | Proliferation      |         |         |         |         |         |        |                       |
| Concentration | 1st                | 2nd     | 3rd     | 4th     | 5th     | Mean    | SD     | P-value (vs. Control) |
| Control       | 100.00%            | 100.00% | 100.00% | 100.00% | 100.00% | 100.00% | 0.00%  |                       |
| 1µM           | 70.20%             | 64.75%  | 96.81%  | 66.67%  | 64.46%  | 72.58%  | 13.74% | <0.001                |
| 5µM           | 60.78%             | 53.24%  | 43.43%  | 57.14%  | 56.20%  | 54.16%  | 6.57%  | <0.001                |
| 10µM          | 35.29%             | 28.78%  | 15.54%  | 11.90%  | 12.40%  | 20.78%  | 10.62% | <0.001                |
|               | Metabolic activity |         |         |         |         |         |        |                       |
| Concentration | 1st                | 2nd     | 3rd     | 4th     |         | Mean    | SD     | P-value (vs. Control) |
| Control       | 100.00%            | 100.00% | 100.00% | 100.00% |         | 100.00% | 0.00%  |                       |
| 1µM           | 85.79%             | 72.69%  | 98.65%  | 82.78%  |         | 84.98%  | 10.70% | 0.06                  |
| 5µM           | 73.00%             | 69.56%  | 89.81%  | 65.67%  |         | 74.51%  | 10.63% | 0.002                 |
| 10µM          | 52.96%             | 55.88%  | 51.30%  | 40.80%  |         | 50.24%  | 6.57%  | <0.001                |
|               | Biomass            |         |         |         |         |         |        |                       |
| Concentration | 1st                | 2nd     | 3rd     | 4th     | 5th     | Mean    | SD     | P-value (vs. Control) |
| Control       | 100.00%            | 100.00% | 100.00% | 100.00% | 100.00% | 100.00% | 0.00%  |                       |
| 1µM           | 59.14%             | 61.16%  | 73.84%  | 59.19%  | 71.41%  | 64.95%  | 7.11%  | <0.001                |
| 5µM           | 56.77%             | 53.55%  | 61.35%  | 55.61%  | 65.04%  | 58.46%  | 4.66%  | <0.001                |
| 10µM          | 20.63%             | 39.60%  | 47.70%  | 27.52%  | 47.21%  | 36.53%  | 12.06% | <0.001                |

| SU.86.86      |                    |         |         |         |         |         |        |                       |
|---------------|--------------------|---------|---------|---------|---------|---------|--------|-----------------------|
|               | Proliferation      |         |         |         |         |         |        |                       |
| Concentration | 1st                | 2nd     | 3rd     | 4th     | 5th     | Mean    | SD     | P-value (vs. Control) |
| Control       | 100.00%            | 100.00% | 100.00% | 100.00% | 100.00% | 100.00% | 0.00%  |                       |
| 1µM           | 91.57%             | 80.00%  | 80.10%  | 80.00%  | 71.29%  | 80.59%  | 7.21%  | <0.001                |
| 5µM           | 71.69%             | 72.73%  | 70.19%  | 66.09%  | 61.39%  | 68.42%  | 4.67%  | <0.001                |
| 7.5µM         |                    |         | 59.13%  | 52.61%  | 51.49%  | 54.41%  | 4.13%  | <0.001                |
| 10µM          | 20.48%             | 5.00%   | 14.46%  | 15.22%  | 9.90%   | 13.01%  | 5.84%  | <0.001                |
|               | Metabolic activity |         |         |         |         |         |        |                       |
| Concentration | 1st                | 2nd     | 3rd     | 4th     | 5th     | Mean    | SD     | P-value (vs. Control) |
| Control       | 100.00%            | 100.00% | 100.00% | 100.00% | 100.00% | 100.00% | 0.00%  |                       |
| 1µM           | 102.01%            | 98.05%  | 81.92%  | 100.61% | 81.87%  | 92.89%  | 10.14% | 0.93                  |
| 5µM           | 84.95%             | 101.47% | 58.47%  | 110.86% | 85.97%  | 88.34%  | 19.93% | 0.73                  |
| 7.5µM         |                    |         | 54.54%  | 94.65%  | 46.62%  | 65.27%  | 25.75% | 0.06                  |
| 10µM          | 50.15%             | 10.91%  | 18.13%  | 77.48%  | 40.74%  | 39.48%  | 26.61% | <0.001                |
|               | Biomass            |         |         |         |         |         |        |                       |
| Concentration | 1st                | 2nd     | 3rd     | 4th     | 5th     | Mean    | SD     | P-value (vs. Control) |
| Control       | 100.00%            | 100.00% | 100.00% | 100.00% | 100.00% | 100.00% | 0.00%  |                       |
| 1µM           | 78.15%             | 71.65%  | 78.63%  | 95.54%  | 93.02%  | 83.40%  | 10.35% | 0.11                  |
| 5µM           | 63.68%             | 65.03%  | 67.01%  | 76.37%  | 81.30%  | 70.68%  | 7.74%  | 0.003                 |
| 7.5µM         |                    |         | 49.24%  | 72.45%  | 56.11%  | 59.27%  | 11.92% | <0.001                |
| 10µM          | 26.61%             | 1.57%   | 15.03%  | 46.55%  | 41.61%  | 26.27%  | 18.60% | <0.001                |

| T3M4          |                    |         |         |         |         |        |                       |
|---------------|--------------------|---------|---------|---------|---------|--------|-----------------------|
| Concentration | Proliferation      |         |         |         | Mean    | SD     | P-value (vs. Control) |
|               | 1st                | 2nd     | 3rd     | 4th     |         |        |                       |
|               | Control            | 100.00% | 100.00% | 100.00% | 100.00% | 0.00%  |                       |
|               | 1µM                | 94.23%  | 93.75%  | 84.29%  | 87.91%  | 7.30%  |                       |
|               | 5µM                | 50.00%  | 55.21%  | 44.29%  | 51.40%  | 5.44%  |                       |
| 10µM          | 6.73%              | 15.10%  | 3.21%   | 15.61%  | 10.16%  | 6.17%  | <0.001                |
| Concentration | Metabolic activity |         |         |         | Mean    | SD     | P-value (vs. Control) |
|               | 1st                | 2nd     | 3rd     | 4th     |         |        |                       |
|               | Control            | 100.00% | 100.00% | 100.00% | 100.00% | 0.00%  |                       |
|               | 1µM                | 109.20% | 110.61% | 105.82% | 104.32% | 8.68%  |                       |
|               | 5µM                | 68.14%  | 88.89%  | 71.93%  | 79.71%  | 11.29% |                       |
| 10µM          | 19.18%             | 39.12%  | 35.41%  | 52.80%  | 36.63%  | 13.83% | <0.001                |
| Concentration | Biomass            |         |         |         | Mean    | SD     | P-value (vs. Control) |
|               | 1st                | 2nd     | 3rd     | 4th     |         |        |                       |
|               | Control            | 100.00% | 100.00% | 100.00% | 100.00% | 0.00%  |                       |
|               | 1µM                | 80.93%  | 86.33%  | 93.09%  | 86.25%  | 5.09%  |                       |
|               | 5µM                | 51.84%  | 42.17%  | 69.17%  | 59.02%  | 14.50% |                       |
| 10µM          | 7.16%              | 9.14%   | 17.96%  | 11.95%  | 11.55%  | 4.70%  | <0.001                |

| Table S2 - IC50 MK-2206 (μM) |               |                    |              |
|------------------------------|---------------|--------------------|--------------|
|                              | Proliferation | Metabolic Activity | Cell Biomass |
| AsPc-1                       | 4.412         | 8.307              | 4.511        |
| BxPc-3                       | 2.943         | 7.233              | 2.341        |
| Capan-1                      | 3.685         | 8.322              | 6.410        |
| Colo357                      | 7.508         | 10.06              | 6.025        |
| Panc-1                       | 3.622         | 11.66              | 3.828        |
| PaTu8902                     | 4.057         | 11.12              | 3.021        |
| PaTu8988S                    | 3.531         | 7.964              | 2.024        |
| PaTu8988T                    | 3.547         | 12.15              | 5.111        |
| SU.86.86                     | 6.659         | 8.892              | 7.340        |
| T3M4                         | 4.975         | 8.204              | 5.541        |

Table S3 - Cell Viability Buparlisib (to 100%Control)

| AsPc-1        |                    |         |         |         |         |         |        |                       |
|---------------|--------------------|---------|---------|---------|---------|---------|--------|-----------------------|
| Concentration | Proliferation      |         |         |         |         | Mean    | SD     | P-value (vs. Control) |
|               | 1st                | 2nd     | 3rd     | 4th     | 5th     |         |        |                       |
| Control       | 100.00%            | 100.00% | 100.00% | 100.00% | 100.00% | 100.00% | 0.00%  |                       |
| 1µM           | 70.27%             | 78.57%  | 65.94%  | 47.06%  | 60.00%  | 64.37%  | 11.81% | <0.001                |
| 2.5µM         |                    |         | 17.19%  | 7.35%   | 19.23%  | 14.59%  | 6.35%  | <0.001                |
| 5µM           | 12.16%             | 14.29%  | 5.00%   | 2.94%   | 3.94%   | 7.67%   | 5.18%  | <0.001                |
| 10µM          | 4.05%              | 9.18%   | 0.50%   | 0.74%   | 0.89%   | 3.07%   | 3.71%  | <0.001                |
| Concentration | Metabolic activity |         |         |         |         | Mean    | SD     | P-value (vs. Control) |
|               | 1st                | 2nd     | 3rd     | 4th     | 5th     |         |        |                       |
| Control       | 100.00%            | 100.00% | 100.00% | 100.00% | 100.00% | 100.00% | 0.00%  |                       |
| 1µM           | 88.00%             | 74.91%  | 106.05% | 81.83%  | 82.46%  | 86.65%  | 11.80% | 0.06                  |
| 2.5µM         |                    |         | 48.03%  | 36.02%  | 37.70%  | 40.58%  | 6.50%  | <0.001                |
| 5µM           | 17.90%             | 19.00%  | 23.41%  | 15.65%  | 19.20%  | 19.03%  | 2.82%  | <0.001                |
| 10µM          | 9.72%              | 10.38%  | 10.61%  | 11.72%  | 12.61%  | 11.01%  | 1.15%  | <0.001                |
| Concentration | Biomass            |         |         |         |         | Mean    | SD     | P-value (vs. Control) |
|               | 1st                | 2nd     | 3rd     | 4th     | 5th     |         |        |                       |
| Control       | 100.00%            | 100.00% | 100.00% | 100.00% | 100.00% | 100.00% | 0.00%  |                       |
| 1µM           | 54.89%             | 48.39%  | 54.40%  | 54.78%  | 61.83%  | 54.86%  | 4.76%  | <0.001                |
| 2.5µM         |                    |         | 14.04%  | 10.72%  | 10.94%  | 11.90%  | 1.86%  | <0.001                |
| 5µM           | 4.55%              | 5.03%   | 1.99%   | 5.44%   | 8.38%   | 5.08%   | 2.28%  | <0.001                |
| 10µM          | 1.76%              | 2.44%   | 1.17%   | 2.60%   | 1.86%   | 1.97%   | 0.57%  | <0.001                |

| BxPc-3        |                    |         |         |  |  |         |        |                       |
|---------------|--------------------|---------|---------|--|--|---------|--------|-----------------------|
| Concentration | Proliferation      |         |         |  |  | Mean    | SD     | P-value (vs. Control) |
|               | 1st                | 2nd     | 3rd     |  |  |         |        |                       |
| Control       | 100.00%            | 100.00% | 100.00% |  |  | 100.00% | 0.00%  |                       |
| 0.5µM         | 81.08%             | 79.52%  | 80.84%  |  |  | 80.48%  | 0.84%  | <0.001                |
| 1µM           | 48.28%             | 33.77%  | 43.33%  |  |  | 41.79%  | 7.38%  | <0.001                |
| 5µM           | 4.35%              | 1.47%   | 3.69%   |  |  | 3.17%   | 1.51%  | <0.001                |
| 10µM          | 1.45%              | 2.65%   | 0.31%   |  |  | 1.47%   | 1.17%  | <0.001                |
| Concentration | Metabolic activity |         |         |  |  | Mean    | SD     | P-value (vs. Control) |
|               | 1st                | 2nd     | 3rd     |  |  |         |        |                       |
| Control       | 100.00%            | 100.00% | 100.00% |  |  | 100.00% | 0.00%  |                       |
| 0.5µM         | 84.24%             | 94.92%  | 61.08%  |  |  | 80.08%  | 17.30% | 0.03                  |
| 1µM           | 28.55%             | 58.59%  | 51.56%  |  |  | 46.23%  | 15.71% | <0.001                |
| 5µM           | 7.77%              | 9.87%   | 8.94%   |  |  | 8.86%   | 1.05%  | <0.001                |
| 10µM          | 5.66%              | 6.35%   | 7.57%   |  |  | 6.53%   | 0.97%  | <0.001                |
| Concentration | Biomass            |         |         |  |  | Mean    | SD     | P-value (vs. Control) |
|               | 1st                | 2nd     | 3rd     |  |  |         |        |                       |
| Control       | 100.00%            | 100.00% | 100.00% |  |  | 100.00% | 0.00%  |                       |
| 0.5µM         | 56.95%             | 47.23%  | 51.80%  |  |  | 51.99%  | 4.86%  | <0.001                |
| 1µM           | 37.15%             | 54.18%  | 30.41%  |  |  | 40.58%  | 12.25% | <0.001                |
| 5µM           | 2.27%              | 2.09%   | 2.34%   |  |  | 2.23%   | 0.13%  | <0.001                |
| 10µM          | 1.29%              | 0.97%   | 1.95%   |  |  | 1.40%   | 0.50%  | <0.001                |

| Capan-1       |                    |         |         |         |         |         |       |                       |
|---------------|--------------------|---------|---------|---------|---------|---------|-------|-----------------------|
| Concentration | Proliferation      |         |         |         |         | Mean    | SD    | P-value (vs. Control) |
|               | 1st                | 2nd     | 3rd     |         |         |         |       |                       |
| Control       | 100.00%            | 100.00% | 100.00% |         |         | 100.00% | 0.00% |                       |
| 1µM           | 45.45%             | 61.33%  | 43.57%  |         |         | 50.12%  | 9.76% | <0.001                |
| 5µM           | 3.03%              | 10.00%  | 4.29%   |         |         | 5.77%   | 3.71% | <0.001                |
| 10µM          | 4.55%              | 10.00%  | 5.00%   |         |         | 6.52%   | 3.03% | <0.001                |
| Concentration | Metabolic activity |         |         |         |         | Mean    | SD    | P-value (vs. Control) |
|               | 1st                | 2nd     | 3rd     |         |         |         |       |                       |
| Control       | 100.00%            | 100.00% | 100.00% |         |         | 100.00% | 0.00% |                       |
| 1µM           | 71.50%             | 85.94%  | 74.26%  |         |         | 77.23%  | 7.67% | 0.01                  |
| 5µM           | 28.67%             | 27.50%  | 15.53%  |         |         | 23.90%  | 7.27% | <0.001                |
| 10µM          | 17.81%             | 32.13%  | 14.87%  |         |         | 21.60%  | 9.23% | <0.001                |
| Concentration | Biomass            |         |         |         |         | Mean    | SD    | P-value (vs. Control) |
|               | 1st                | 2nd     | 3rd     | 4th     | 5th     |         |       |                       |
| Control       | 100.00%            | 100.00% | 100.00% | 100.00% | 100.00% | 100.00% | 0.00% |                       |
| 1µM           | 48.97%             | 57.98%  | 62.35%  | 45.57%  | 48.76%  | 52.73%  | 7.09% | <0.001                |
| 5µM           | 11.40%             | 9.46%   | 8.54%   | 2.74%   | 2.52%   | 6.93%   | 4.06% | <0.001                |
| 10µM          | 7.72%              | 2.83%   | 6.17%   | 2.35%   | 0.79%   | 3.97%   | 2.87% | <0.001                |

| Colo357            |         |         |         |         |         |         |        |                       |
|--------------------|---------|---------|---------|---------|---------|---------|--------|-----------------------|
| Proliferation      |         |         |         |         |         |         |        |                       |
| Concentration      | 1st     | 2nd     | 3rd     | 4th     | 5th     | Mean    | SD     | P-value (vs. Control) |
| Control            | 100.00% | 100.00% | 100.00% | 100.00% | 100.00% | 100.00% | 0.00%  |                       |
| 0.5µM              | 51.24%  | 50.56%  | 63.60%  | 47.58%  | 43.16%  | 51.23%  | 7.61%  | <0.001                |
| 1µM                | 34.73%  | 44.94%  | 26.75%  | 8.87%   | 8.77%   | 24.81%  | 15.96% | <0.001                |
| 5µM                | 3.05%   | 7.30%   | 5.26%   | 3.63%   | 2.46%   | 4.34%   | 1.96%  | <0.001                |
| Metabolic activity |         |         |         |         |         |         |        |                       |
| Concentration      | 1st     | 2nd     | 3rd     | 4th     |         | Mean    | SD     | P-value (vs. Control) |
| Control            | 100.00% | 100.00% | 100.00% | 100.00% |         | 100.00% | 0.00%  |                       |
| 0.5µM              | 81.75%  | 94.74%  | 78.76%  | 62.65%  |         | 79.48%  | 13.19% | 0.01                  |
| 1µM                | 61.87%  | 34.88%  | 44.71%  | 35.45%  |         | 44.23%  | 12.60% | <0.001                |
| 5µM                | 18.14%  | 12.65%  | 4.14%   | 10.86%  |         | 11.45%  | 5.77%  | <0.001                |
| Biomass            |         |         |         |         |         |         |        |                       |
| Concentration      | 1st     | 2nd     | 3rd     | 4th     |         | Mean    | SD     | P-value (vs. Control) |
| Control            | 100.00% | 100.00% | 100.00% | 100.00% |         | 100.00% | 0.00%  |                       |
| 0.5µM              | 74.72%  | 100.63% | 87.67%  | 69.95%  |         | 83.24%  | 13.80% | 0.11                  |
| 1µM                | 66.80%  | 42.78%  | 32.50%  | 23.19%  |         | 41.32%  | 18.78% | <0.001                |
| 5µM                | 5.71%   | 6.57%   | 4.49%   | 3.28%   |         | 5.01%   | 1.44%  | <0.001                |

| Panc-1        |                    |         |         |         |        |                       |
|---------------|--------------------|---------|---------|---------|--------|-----------------------|
|               | Proliferation      |         |         |         |        |                       |
| Concentration | 1st                | 2nd     | 3rd     | Mean    | SD     | P-value (vs. Control) |
| Control       | 100.00%            | 100.00% | 100.00% | 100.00% | 0.00%  |                       |
| 1μM           | 66.04%             | 64.74%  | 62.82%  | 64.53%  | 1.62%  | <0.001                |
| 5μM           | 7.55%              | 20.53%  | 10.90%  | 12.99%  | 6.74%  | <0.001                |
| 10μM          | 9.43%              | 12.11%  | 11.54%  | 11.03%  | 1.41%  | <0.001                |
|               | Metabolic activity |         |         |         |        |                       |
| Concentration | 1st                | 2nd     | 3rd     | Mean    | SD     | P-value (vs. Control) |
| Control       | 100.00%            | 100.00% | 100.00% | 100.00% | 0.00%  |                       |
| 1μM           | 85.20%             | 74.31%  | 61.35%  | 73.62%  | 11.94% | 0.02                  |
| 5μM           | 43.41%             | 30.90%  | 22.58%  | 32.30%  | 10.49% | <0.001                |
| 10μM          | 33.17%             | 25.17%  | 17.93%  | 25.42%  | 7.62%  | <0.001                |
|               | Biomass            |         |         |         |        |                       |
| Concentration | 1st                | 2nd     | 3rd     | Mean    | SD     | P-value (vs. Control) |
| Control       | 100.00%            | 100.00% | 100.00% | 100.00% | 0.00%  |                       |
| 1μM           | 95.74%             | 92.15%  | 49.86%  | 79.25%  | 25.52% | 0.24                  |
| 5μM           | 24.24%             | 32.46%  | 13.06%  | 23.25%  | 9.74%  | <0.001                |
| 10μM          | 11.87%             | 23.10%  | 8.62%   | 14.53%  | 7.60%  | <0.001                |

| PaTu8902      |                    |         |         |         |         |         |        |                       |
|---------------|--------------------|---------|---------|---------|---------|---------|--------|-----------------------|
|               | Proliferation      |         |         |         |         |         |        |                       |
| Concentration | 1st                | 2nd     | 3rd     | 4th     | 5th     | Mean    | SD     | P-value (vs. Control) |
| Control       | 100.00%            | 100.00% | 100.00% | 100.00% | 100.00% | 100.00% | 0.00%  |                       |
| 0.5µM         | 60.45%             | 65.00%  | 67.31%  | 63.82%  | 62.50%  | 63.82%  | 2.58%  | <0.001                |
| 1µM           | 34.99%             | 42.00%  | 52.88%  | 26.32%  | 47.32%  | 40.70%  | 10.41% | <0.001                |
| 2.5µM         | 6.74%              | 29.00%  | 9.62%   | 5.26%   | 13.39%  | 12.80%  | 9.57%  | <0.001                |
|               | Metabolic activity |         |         |         |         |         |        |                       |
| Concentration | 1st                | 2nd     | 3rd     |         |         | Mean    | SD     | P-value (vs. Control) |
| Control       | 100.00%            | 100.00% | 100.00% |         |         | 100.00% | 0.00%  |                       |
| 0.5µM         | 91.43%             | 82.15%  | 86.30%  |         |         | 86.63%  | 4.65%  | 0.34                  |
| 1µM           | 78.44%             | 77.17%  | 86.46%  |         |         | 80.69%  | 5.04%  | 0.13                  |
| 2.5µM         | 56.69%             | 20.46%  | 52.82%  |         |         | 43.32%  | 19.89% | <0.001                |
|               | Biomass            |         |         |         |         |         |        |                       |
| Concentration | 1st                | 2nd     | 3rd     |         |         | Mean    | SD     | P-value (vs. Control) |
| Control       | 100.00%            | 100.00% | 100.00% |         |         | 100.00% | 0.00%  |                       |
| 0.5µM         | 56.56%             | 77.20%  | 76.40%  |         |         | 70.05%  | 11.69% | 0.02                  |
| 1µM           | 36.02%             | 61.74%  | 67.25%  |         |         | 55.00%  | 16.67% | 0.002                 |
| 2.5µM         | 11.63%             | 11.22%  | 11.89%  |         |         | 11.58%  | 0.34%  | <0.001                |

| PaTu8988S     |                    |         |         |         |         |        |                       |
|---------------|--------------------|---------|---------|---------|---------|--------|-----------------------|
| Concentration | Proliferation      |         |         |         | Mean    | SD     | P-value (vs. Control) |
|               | 1st                | 2nd     | 3rd     | 4th     |         |        |                       |
| Control       | 100.00%            | 100.00% | 100.00% |         | 100.00% | 0.00%  |                       |
| 0.5µM         | 86.44%             | 87.10%  | 88.70%  |         | 87.41%  | 1.16%  | 0.001                 |
| 1µM           | 52.54%             | 62.37%  | 53.26%  |         | 56.06%  | 5.48%  | <0.001                |
| 2.5µM         | 8.47%              | 8.60%   | 8.70%   |         | 8.59%   | 0.12%  | <0.001                |
| Concentration | Metabolic activity |         |         |         | Mean    | SD     | P-value (vs. Control) |
|               | 1st                | 2nd     | 3rd     | 4th     |         |        |                       |
| Control       | 100.00%            | 100.00% | 100.00% | 100.00% | 100.00% | 0.00%  |                       |
| 0.5µM         | 80.82%             | 79.03%  | 86.91%  | 79.51%  | 81.57%  | 3.64%  | 0.003                 |
| 1µM           | 56.90%             | 45.58%  | 67.97%  | 49.56%  | 55.00%  | 9.83%  | <0.001                |
| 2.5µM         | 42.91%             | 28.10%  | 37.23%  | 41.21%  | 37.36%  | 6.62%  | <0.001                |
| Concentration | Biomass            |         |         |         | Mean    | SD     | P-value (vs. Control) |
|               | 1st                | 2nd     | 3rd     | 4th     |         |        |                       |
| Control       | 100.00%            | 100.00% | 100.00% | 100.00% | 100.00% | 0.00%  |                       |
| 0.5µM         | 74.33%             | 81.28%  | 70.55%  | 80.76%  | 76.73%  | 5.19%  | 0.005                 |
| 1µM           | 43.89%             | 73.99%  | 60.91%  | 59.40%  | 59.55%  | 12.32% | <0.001                |
| 2.5µM         | 33.38%             | 44.88%  | 22.66%  | 25.21%  | 31.53%  | 10.00% | <0.001                |

| PaTu8988T     |                    |         |         |         |         |        |                       |
|---------------|--------------------|---------|---------|---------|---------|--------|-----------------------|
| Concentration | Proliferation      |         |         |         | Mean    | SD     | P-value (vs. Control) |
|               | 1st                | 2nd     | 3rd     | 4th     |         |        |                       |
| Control       | 100.00%            | 100.00% | 100.00% | 100.00% | 100.00% | 0.00%  |                       |
| 0.5µM         | 45.32%             | 45.82%  | 52.69%  | 56.20%  | 50.01%  | 5.32%  | <0.001                |
| 1µM           | 22.55%             | 20.86%  | 22.71%  | 38.32%  | 26.11%  | 8.18%  | <0.001                |
| 2.5µM         | 13.73%             | 16.55%  | 12.75%  | 22.75%  | 16.45%  | 4.50%  | <0.001                |
| Concentration | Metabolic activity |         |         |         | Mean    | SD     | P-value (vs. Control) |
|               | 1st                | 2nd     | 3rd     | 4th     |         |        |                       |
| Control       | 100.00%            | 100.00% | 100.00% | 100.00% | 100.00% | 0.00%  |                       |
| 0.5µM         | 83.33%             | 88.54%  | 79.98%  | 81.62%  | 83.37%  | 3.71%  | 0.14                  |
| 1µM           | 31.34%             | 69.39%  | 49.55%  | 72.75%  | 55.76%  | 19.23% | <0.001                |
| 2.5µM         | 25.23%             | 22.12%  | 29.14%  | 29.62%  | 26.53%  | 3.54%  | <0.001                |
| Concentration | Biomass            |         |         |         | Mean    | SD     | P-value (vs. Control) |
|               | 1st                | 2nd     | 3rd     | 4th     |         |        |                       |
| Control       | 100.00%            | 100.00% | 100.00% | 100.00% | 100.00% | 0.00%  |                       |
| 0.5µM         | 71.71%             | 82.33%  | 59.19%  | 71.41%  | 71.16%  | 9.46%  | <0.001                |
| 1µM           | 56.31%             | 54.43%  | 65.23%  | 55.61%  | 57.90%  | 4.95%  | <0.001                |
| 2.5µM         | 21.03%             | 22.34%  | 22.90%  | 27.52%  | 23.45%  | 2.83%  | <0.001                |

| SU.86.86      |                    |         |         |         |         |         |        |                       |
|---------------|--------------------|---------|---------|---------|---------|---------|--------|-----------------------|
|               | Proliferation      |         |         |         |         |         |        |                       |
| Concentration | 1st                | 2nd     | 3rd     | 4th     | 5th     | Mean    | SD     | P-value (vs. Control) |
| Control       | 100.00%            | 100.00% | 100.00% | 100.00% | 100.00% | 100.00% | 0.00%  |                       |
| 1µM           | 81.33%             | 79.89%  | 72.06%  | 81.08%  | 93.75%  | 81.62%  | 7.78%  | <0.001                |
| 2.5µM         |                    |         | 40.69%  | 58.56%  | 57.69%  | 52.31%  | 10.08% | <0.001                |
| 5µM           | 14.00%             | 16.85%  | 16.18%  | 30.63%  | 19.23%  | 19.38%  | 6.56%  | <0.001                |
| 10µM          | 12.00%             | 14.67%  | 15.20%  | 15.77%  | 9.62%   | 13.45%  | 2.58%  | <0.001                |
|               | Metabolic activity |         |         |         |         |         |        |                       |
| Concentration | 1st                | 2nd     | 3rd     | 4th     | 5th     | Mean    | SD     | P-value (vs. Control) |
| Control       | 100.00%            | 100.00% | 100.00% | 100.00% | 100.00% | 100.00% | 0.00%  |                       |
| 1µM           | 89.48%             | 105.41% | 85.84%  | 85.92%  | 87.26%  | 90.78%  | 8.31%  | 0.04                  |
| 2.5µM         |                    |         | 56.61%  | 62.07%  | 75.45%  | 64.71%  | 9.69%  | <0.001                |
| 5µM           | 46.69%             | 60.65%  | 39.47%  | 42.31%  | 38.66%  | 45.56%  | 9.00%  | <0.001                |
| 10µM          | 39.32%             | 40.85%  | 23.10%  | 28.64%  | 14.77%  | 29.34%  | 11.00% | <0.001                |
|               | Biomass            |         |         |         |         |         |        |                       |
| Concentration | 1st                | 2nd     | 3rd     | 4th     | 5th     | Mean    | SD     | P-value (vs. Control) |
| Control       | 100.00%            | 100.00% | 100.00% | 100.00% | 100.00% | 100.00% | 0.00%  |                       |
| 1µM           | 52.98%             | 71.59%  | 68.68%  | 69.51%  | 84.75%  | 69.50%  | 11.30% | <0.001                |
| 2.5µM         |                    |         | 30.60%  | 43.05%  | 44.32%  | 39.32%  | 7.58%  | <0.001                |
| 5µM           | 16.95%             | 15.12%  | 15.73%  | 12.03%  | 13.94%  | 14.75%  | 1.87%  | <0.001                |
| 10µM          | 16.23%             | 14.81%  | 12.62%  | 15.31%  | 9.63%   | 13.72%  | 2.64%  | <0.001                |

| T3M4               |         |         |         |         |        |                       |
|--------------------|---------|---------|---------|---------|--------|-----------------------|
| Proliferation      |         |         |         |         |        |                       |
| Concentration      | 1st     | 2nd     | 3rd     | Mean    | SD     | P-value (vs. Control) |
| Control            | 100.00% | 100.00% | 100.00% | 100.00% | 0.00%  |                       |
| 0.5µM              | 46.15%  | 41.67%  | 51.85%  | 46.56%  | 5.10%  | <0.001                |
| 1µM                | 22.60%  | 27.08%  | 29.10%  | 26.26%  | 3.33%  | <0.001                |
| 2.5µM              | 1.92%   | 2.08%   | 2.91%   | 2.30%   | 0.53%  | <0.001                |
| Metabolic activity |         |         |         |         |        |                       |
| Concentration      | 1st     | 2nd     | 3rd     | Mean    | SD     | P-value (vs. Control) |
| Control            | 100.00% | 100.00% | 100.00% | 100.00% | 0.00%  |                       |
| 0.5µM              | 63.74%  | 66.68%  | 70.45%  | 66.96%  | 3.36%  | 0.006                 |
| 1µM                | 30.78%  | 26.28%  | 59.70%  | 38.92%  | 18.14% | <0.001                |
| 2.5µM              | 3.57%   | 4.23%   | 7.74%   | 5.18%   | 2.24%  | <0.001                |
| Biomass            |         |         |         |         |        |                       |
| Concentration      | 1st     | 2nd     | 3rd     | Mean    | SD     | P-value (vs. Control) |
| Control            | 100.00% | 100.00% | 100.00% | 100.00% | 0.00%  |                       |
| 0.5µM              | 51.20%  | 64.81%  | 59.89%  | 58.63%  | 6.89%  | <0.001                |
| 1µM                | 26.72%  | 16.09%  | 32.77%  | 25.19%  | 8.44%  | <0.001                |
| 2.5µM              | 4.74%   | 3.43%   | 5.06%   | 4.41%   | 0.86%  | <0.001                |

Table S4 - IC50 Buparlisib (μM)

|           | Proliferation | Metabolic Activity | Cell Biomass |
|-----------|---------------|--------------------|--------------|
| AsPc-1    | 1.282         | 2.284              | 1.087        |
| BxPc-3    | 0.8797        | 0.9969             | 0.6022       |
| Capan-1   | 0.9985        | 2.473              | 1.068        |
| Colo357   | 0.5104        | 0.9622             | 0.8822       |
| Panc-1    | 1.512         | 2.723              | 2.419        |
| PaTu8902  | 0.7478        | 2.168              | 0.9625       |
| PaTu8988S | 1.081         | 1.451              | 1.344        |
| PaTu8988T | 0.4824        | 1.240              | 1.159        |
| SU.86.86  | 2.469         | 4.098              | 1.774        |
| T3M4      | 0.4741        | 0.7471             | 0.5916       |

Table S5 - Apoptosis/Necrosis MK-2206 (%)

| AsPc-1        |             |         |             |         |             |         |               |         |                       |         |               |      |                       |  |
|---------------|-------------|---------|-------------|---------|-------------|---------|---------------|---------|-----------------------|---------|---------------|------|-----------------------|--|
| Concentration | 1st         |         | 2nd         |         | 3rd         |         | Mean<br>G2+G3 | SD      | P-Value (vs. Control) |         |               |      |                       |  |
|               | G2(YP+/PI-) | G3(PI+) | G2(YP+/PI-) | G3(PI+) | G2(YP+/PI-) | G3(PI+) |               |         |                       |         |               |      |                       |  |
| Control       | 0.63        | 4.30    | 3.45        | 5.06    | 1.89        | 2.49    | 5.94          | 1.83    |                       |         |               |      |                       |  |
| 1µM           | 0.73        | 5.17    | 3.15        | 8.91    | 2.47        | 3.38    | 7.94          | 2.92    | >0.99                 |         |               |      |                       |  |
| 5µM           | 0.41        | 9.49    | 1.62        | 9.27    | 2.03        | 7.85    | 10.22         | 0.47    | 0.42                  |         |               |      |                       |  |
| 10µM          | 0.11        | 12.6    | 1.01        | 11.2    | 1.73        | 11.4    | 12.68         | 0.38    | 0.01                  |         |               |      |                       |  |
|               |             |         |             |         |             |         |               |         |                       |         |               |      |                       |  |
| BxPc-3        |             |         |             |         |             |         |               |         |                       |         |               |      |                       |  |
| Concentration | 1st         |         | 2nd         |         | 3rd         |         | Mean<br>G2+G3 | SD      | P-Value (vs. Control) |         |               |      |                       |  |
|               | G2(YP+/PI-) | G3(PI+) | G2(YP+/PI-) | G3(PI+) | G2(YP+/PI-) | G3(PI+) |               |         |                       |         |               |      |                       |  |
| Control       | 2.25        | 1.66    | 1.12        | 1.82    | 1.41        | 1.55    | 3.27          | 0.45    |                       |         |               |      |                       |  |
| 1µM           | 2.87        | 4.61    | 1.72        | 3.60    | 1.68        | 3.40    | 5.96          | 1.08    | 0.02                  |         |               |      |                       |  |
| 5µM           | 1.02        | 3.81    | 1.61        | 3.66    | 1.34        | 3.60    | 5.01          | 0.19    | 0.34                  |         |               |      |                       |  |
| 10µM          | 1.45        | 4.95    | 1.05        | 3.70    | 0.94        | 4.05    | 5.38          | 0.73    | 0.21                  |         |               |      |                       |  |
|               |             |         |             |         |             |         |               |         |                       |         |               |      |                       |  |
| Capan-1       |             |         |             |         |             |         |               |         |                       |         |               |      |                       |  |
| Concentration | 1st         |         | 2nd         |         | 3rd         |         | Mean<br>G2+G3 | SD      | P-Value (vs. Control) |         |               |      |                       |  |
|               | G2(YP+/PI-) | G3(PI+) | G2(YP+/PI-) | G3(PI+) | G2(YP+/PI-) | G3(PI+) |               |         |                       |         |               |      |                       |  |
| Control       | 6.60        | 5.70    | 1.75        | 4.94    | 1.68        | 4.34    | 8.34          | 2.82    |                       |         |               |      |                       |  |
| 1µM           | 7.55        | 7.42    | 3.88        | 3.90    | 3.61        | 6.70    | 11.02         | 2.98    | 0.76                  |         |               |      |                       |  |
| 5µM           | 7.62        | 9.46    | 2.54        | 4.05    | 3.72        | 7.64    | 11.68         | 4.29    | 0.64                  |         |               |      |                       |  |
| 10µM          | 4.51        | 11.3    | 2.52        | 9.40    | 2.24        | 6.27    | 12.08         | 2.98    | 0.56                  |         |               |      |                       |  |
|               |             |         |             |         |             |         |               |         |                       |         |               |      |                       |  |
| Colo357       |             |         |             |         |             |         |               |         |                       |         |               |      |                       |  |
| Concentration | 1st         |         | 2nd         |         | 3rd         |         | 4th           |         | 5th                   |         | Mean<br>G2+G3 | SD   | P-Value (vs. Control) |  |
|               | G2(YP+/PI-) | G3(PI+) | G2(YP+/PI-) | G3(PI+) | G2(YP+/PI-) | G3(PI+) | G2(YP+/PI-)   | G3(PI+) | G2(YP+/PI-)           | G3(PI+) |               |      |                       |  |
| Control       | 3.05        | 2.17    | 2.13        | 1.42    | 2.87        | 1.11    | 1.24          | 0.90    | 1.70                  | 1.00    | 3.52          | 1.07 |                       |  |
| 1µM           | 1.58        | 1.6     | 3.46        | 2.45    | 2.35        | 1.01    | 1.22          | 1.69    | 3.31                  | 2.17    | 4.17          | 1.26 | 0.84                  |  |
| 5µM           | 3.81        | 1.16    | 2.72        | 3.84    | 3.21        | 1.39    | 1.67          | 2.05    | 3.69                  | 3.65    | 5.44          | 1.32 | 0.15                  |  |
| 10µM          | 1.73        | 3.32    | 1.44        | 5.91    | 1.66        | 2.82    | 1.30          | 4.77    | 4.09                  | 5.10    | 6.43          | 1.69 | 0.02                  |  |
|               |             |         |             |         |             |         |               |         |                       |         |               |      |                       |  |
| Panc-1        |             |         |             |         |             |         |               |         |                       |         |               |      |                       |  |
| Concentration | 1st         |         | 2nd         |         | 3rd         |         | Mean<br>G2+G3 | SD      | P-Value (vs. Control) |         |               |      |                       |  |
|               | G2(YP+/PI-) | G3(PI+) | G2(YP+/PI-) | G3(PI+) | G2(YP+/PI-) | G3(PI+) |               |         |                       |         |               |      |                       |  |
| Control       | 0.76        | 1.27    | 1.1         | 0.55    | 0.34        | 1.12    | 1.71          | 0.24    |                       |         |               |      |                       |  |
| 1µM           | 0.35        | 1.03    | 0.27        | 0.86    | 0.92        | 1.35    | 1.59          | 0.49    | >0.99                 |         |               |      |                       |  |
| 5µM           | 0.36        | 0.99    | 0.36        | 2.31    | 0.98        | 2.73    | 2.58          | 0.97    | 0.65                  |         |               |      |                       |  |
| 10µM          | 0.58        | 4.97    | 0.42        | 2.78    | 0.83        | 1.59    | 3.72          | 1.33    | 0.11                  |         |               |      |                       |  |
|               |             |         |             |         |             |         |               |         |                       |         |               |      |                       |  |
| PaTu8902      |             |         |             |         |             |         |               |         |                       |         |               |      |                       |  |
| Concentration | 1st         |         | 2nd         |         | 3rd         |         | Mean<br>G2+G3 | SD      | P-Value (vs. Control) |         |               |      |                       |  |
|               | G2(YP+/PI-) | G3(PI+) | G2(YP+/PI-) | G3(PI+) | G2(YP+/PI-) | G3(PI+) |               |         |                       |         |               |      |                       |  |
| Control       | 2.42        | 2.41    | 0.48        | 2.77    | 0.37        | 0.90    | 3.12          | 1.46    |                       |         |               |      |                       |  |
| 1µM           | 0.22        | 1.31    | 0.29        | 1.52    | 0.21        | 0.91    | 1.49          | 0.28    | 0.15                  |         |               |      |                       |  |
| 5µM           | 0.18        | 1.49    | 0.12        | 1.33    | 0.12        | 0.88    | 1.37          | 0.28    | 0.12                  |         |               |      |                       |  |
| 10µM          | 0.18        | 1.54    | 0.11        | 1.11    | 0.087       | 0.92    | 1.32          | 0.30    | 0.11                  |         |               |      |                       |  |
|               |             |         |             |         |             |         |               |         |                       |         |               |      |                       |  |
| PaTu8988S     |             |         |             |         |             |         |               |         |                       |         |               |      |                       |  |
| Concentration | 1st         |         | 2nd         |         | 3rd         |         | Mean<br>G2+G3 | SD      | P-Value (vs. Control) |         |               |      |                       |  |
|               | G2(YP+/PI-) | G3(PI+) | G2(YP+/PI-) | G3(PI+) | G2(YP+/PI-) | G3(PI+) |               |         |                       |         |               |      |                       |  |
| Control       | 5.01        | 12.7    | 4.82        | 17.7    | 3.4         | 13.9    | 19.18         | 2.37    |                       |         |               |      |                       |  |
| 1µM           | 3.41        | 9.78    | 1.90        | 10.5    | 2.73        | 10.7    | 13.01         | 0.44    | 0.42                  |         |               |      |                       |  |
| 5µM           | 1.86        | 6.84    | 0.52        | 10.1    | 1.63        | 13.7    | 11.55         | 2.79    | 0.09                  |         |               |      |                       |  |
| 10µM          | 1.13        | 8.14    | 0.46        | 8.75    | 0.97        | 11.5    | 10.32         | 1.52    | 0.04                  |         |               |      |                       |  |
|               |             |         |             |         |             |         |               |         |                       |         |               |      |                       |  |
| PaTu8988T     |             |         |             |         |             |         |               |         |                       |         |               |      |                       |  |
| Concentration | 1st         |         | 2nd         |         | 3rd         |         | Mean<br>G2+G3 | SD      | P-Value (vs. Control) |         |               |      |                       |  |
|               | G2(YP+/PI-) | G3(PI+) | G2(YP+/PI-) | G3(PI+) | G2(YP+/PI-) | G3(PI+) |               |         |                       |         |               |      |                       |  |
| Control       | 0.10        | 0.94    | 0.260       | 3.92    | 0.010       | 1.19    | 2.14          | 1.45    |                       |         |               |      |                       |  |
| 1µM           | 0.11        | 1.24    | 0.086       | 3.03    | 0.005       | 0.96    | 1.81          | 0.94    | >0.99                 |         |               |      |                       |  |
| 5µM           | 0.07        | 1.14    | 0.029       | 2.06    | 0.005       | 0.78    | 1.36          | 0.54    | >0.99                 |         |               |      |                       |  |
| 10µM          | 0.02        | 0.98    | 0.048       | 4.73    | 0.000       | 0.94    | 2.24          | 1.80    | >0.99                 |         |               |      |                       |  |
|               |             |         |             |         |             |         |               |         |                       |         |               |      |                       |  |
| SU.86.86      |             |         |             |         |             |         |               |         |                       |         |               |      |                       |  |
| Concentration | 1st         |         | 2nd         |         | 3rd         |         | Mean<br>G2+G3 | SD      | P-Value (vs. Control) |         |               |      |                       |  |
|               | G2(YP+/PI-) | G3(PI+) | G2(YP+/PI-) | G3(PI+) | G2(YP+/PI-) | G3(PI+) |               |         |                       |         |               |      |                       |  |
| Control       | 1.40        | 2.73    | 1.98        | 4.49    | 1.47        | 4.11    | 3.78          | 0.76    |                       |         |               |      |                       |  |
| 1µM           | 0.41        | 3.3     | 1.42        | 4.19    | 3.22        | 10.80   | 6.10          | 3.35    | 0.68                  |         |               |      |                       |  |
| 7.5µM         | 0.31        | 4.14    | 1.87        | 6.29    | 1.99        | 6.37    | 5.60          | 1.03    | 0.87                  |         |               |      |                       |  |
| 10µM          | 0.68        | 5.24    | 1.71        | 7.18    | 1.29        | 4.92    | 5.78          | 1.00    | 0.86                  |         |               |      |                       |  |
|               |             |         |             |         |             |         |               |         |                       |         |               |      |                       |  |
| T3M4          |             |         |             |         |             |         |               |         |                       |         |               |      |                       |  |
| Concentration | 1st         |         | 2nd         |         | 3rd         |         | Mean<br>G2+G3 | SD      | P-Value (vs. Control) |         |               |      |                       |  |
|               | G2(YP+/PI-) | G3(PI+) | G2(YP+/PI-) | G3(PI+) | G2(YP+/PI-) | G3(PI+) |               |         |                       |         |               |      |                       |  |
| Control       | 8.02        | 2.66    | 6.00        | 1.85    | 8.58        | 3.96    | 10.36         | 1.93    |                       |         |               |      |                       |  |
| 1µM           | 7.21        | 3.62    | 6.80        | 2.03    | 7.55        | 5.05    | 10.75         | 1.54    | 0.99                  |         |               |      |                       |  |
| 5µM           | 4.30        | 3.89    | 4.26        | 2.80    | 3.21        | 3.28    | 7.25          | 0.71    | 0.18                  |         |               |      |                       |  |
| 10µM          | 4.04        | 7.97    | 2.66        | 7.57    | 2.91        | 5.01    | 10.05         | 1.67    | >0.99                 |         |               |      |                       |  |

G2: Apoptosis  
G3: Necrosis  
G2+G3: Cell Deaths

Table S6 - Apoptosis/Necrosis Buparlisib (%)

| AsPc-1        |             |         |             |         |             |         |             |         |             |         |               |
|---------------|-------------|---------|-------------|---------|-------------|---------|-------------|---------|-------------|---------|---------------|
|               | 1st         |         | 2nd         |         | 3rd         |         | 4th         |         | 5th         |         |               |
| Concentration | G2(YP+/PI-) | G3(PI+) | Mean<br>G2+G3 |
| Control       | 0.51        | 4.53    | 3.26        | 5.64    | 1.60        | 3.05    | 1.63        | 5.47    | 1.08        | 3.63    | 6.08          |
| 1µM           | 0.66        | 11.5    | 3.13        | 14.9    | 2.66        | 9.9     | 2.72        | 8.60    | 2.23        | 6.35    | 12.53         |
| 2.5µM         | 1.13        | 37.8    | 2.39        | 36.7    | 6.20        | 32.3    | 2.77        | 46.4    | 2.94        | 39.8    | 41.69         |
| 5µM           | 0.42        | 48.8    | 0.86        | 67.0    | 4.53        | 54.8    | 1.87        | 66.8    | 1.79        | 64.7    | 62.31         |
|               |             |         |             |         |             |         |             |         |             |         |               |
| BxPc-3        |             |         |             |         |             |         |             |         |             |         |               |
|               | 1st         |         | 2nd         |         | 3rd         |         |             |         |             |         |               |
| Concentration | G2(YP+/PI-) | G3(PI+) | G2(YP+/PI-) | G3(PI+) | G2(YP+/PI-) | G3(PI+) |             |         |             |         | Mean<br>G2+G3 |
| Control       | 0.55        | 2.23    | 1.86        | 1.92    | 1.68        | 3.07    |             |         |             |         | 3.77          |
| 1µM           | 0.56        | 14.2    | 1.35        | 4.63    | 2.52        | 5.68    |             |         |             |         | 9.65          |
| 5µM           | 0.04        | 88.6    | 1.58        | 65.9    | 1.09        | 75.2    |             |         |             |         | 3.73          |
| 10µM          | 0.19        | 85.7    | 1.08        | 81.3    | 0.73        | 87.7    |             |         |             |         | 8.68          |
|               |             |         |             |         |             |         |             |         |             |         |               |
| Capan-1       |             |         |             |         |             |         |             |         |             |         |               |
|               | 1st         |         | 2nd         |         | 3rd         |         |             |         |             |         |               |
| Concentration | G2(YP+/PI-) | G3(PI+) | G2(YP+/PI-) | G3(PI+) | G2(YP+/PI-) | G3(PI+) |             |         |             |         | Mean<br>G2+G3 |
| Control       | 1.67        | 6.88    | 1.55        | 4.76    | 5.01        | 9.13    |             |         |             |         | 9.67          |
| 1µM           | 2.13        | 8.63    | 1.99        | 9.67    | 5.79        | 7.12    |             |         |             |         | 3.29          |
| 5µM           | 6.62        | 32.0    | 5.18        | 25.6    | 4.46        | 29.9    |             |         |             |         | 0.88          |
| 10µM          | 3.49        | 34.6    | 4.50        | 27.5    | 4.79        | 37.3    |             |         |             |         | 3.20          |
|               |             |         |             |         |             |         |             |         |             |         |               |
| Colo357       |             |         |             |         |             |         |             |         |             |         |               |
|               | 1st         |         | 2nd         |         | 3rd         |         |             |         |             |         |               |
| Concentration | G2(YP+/PI-) | G3(PI+) | G2(YP+/PI-) | G3(PI+) | G2(YP+/PI-) | G3(PI+) |             |         |             |         | Mean<br>G2+G3 |
| Control       | 4.00        | 2.20    | 3.31        | 1.64    | 1.59        | 1.04    |             |         |             |         | 4.59          |
| 0.5µM         | 3.53        | 2.38    | 4.92        | 4.53    | 2.89        | 2.72    |             |         |             |         | 1.48          |
| 1µM           | 3.89        | 1.74    | 3.71        | 5.49    | 2.86        | 3.44    |             |         |             |         | 1.74          |
| 5µM           | 3.24        | 19.6    | 2.51        | 21.0    | 1.97        | 19.4    |             |         |             |         | 1.55          |
|               |             |         |             |         |             |         |             |         |             |         |               |
| Panc-1        |             |         |             |         |             |         |             |         |             |         |               |
|               | 1st         |         | 2nd         |         | 3rd         |         |             |         |             |         |               |
| Concentration | G2(YP+/PI-) | G3(PI+) | G2(YP+/PI-) | G3(PI+) | G2(YP+/PI-) | G3(PI+) |             |         |             |         | Mean<br>G2+G3 |
| Control       | 0.60        | 1.15    | 0.56        | 0.58    | 0.18        | 1.08    |             |         |             |         | 1.38          |
| 1µM           | 0.46        | 1.25    | 1.16        | 1.60    | 0.33        | 0.66    |             |         |             |         | 0.26          |
| 5µM           | 0.55        | 1.66    | 1.25        | 2.54    | 1.50        | 2.11    |             |         |             |         | 1.82          |
| 10µM          | 0.78        | 3.47    | 1.52        | 3.76    | 1.86        | 3.77    |             |         |             |         | 0.73          |
|               |             |         |             |         |             |         |             |         |             |         |               |
| PaTu8902      |             |         |             |         |             |         |             |         |             |         |               |
|               | 1st         |         | 2nd         |         | 3rd         |         |             |         |             |         |               |
| Concentration | G2(YP+/PI-) | G3(PI+) | G2(YP+/PI-) | G3(PI+) | G2(YP+/PI-) | G3(PI+) |             |         |             |         | Mean<br>G2+G3 |
| Control       | 0.32        | 1.96    | 0.49        | 2.81    | 0.24        | 2.21    |             |         |             |         | 2.68          |
| 1µM           | 0.13        | 2.20    | 0.31        | 3.61    | 0.14        | 4.36    |             |         |             |         | 0.45          |
| 2.5µM         | 0.12        | 8.53    | 0.28        | 12.5    | 0.32        | 14.2    |             |         |             |         | 3.58          |
| 5µM           | 0.20        | 9.97    | 0.37        | 17.4    | 0.23        | 19.4    |             |         |             |         | 0.92          |
| 10µM          | 0.11        | 25.1    | 0.33        | 30.1    | 0.19        | 23.5    |             |         |             |         | 11.98         |
|               |             |         |             |         |             |         |             |         |             |         |               |
| PaTu8988S     |             |         |             |         |             |         |             |         |             |         |               |
|               | 1st         |         | 2nd         |         | 3rd         |         |             |         |             |         |               |
| Concentration | G2(YP+/PI-) | G3(PI+) | G2(YP+/PI-) | G3(PI+) | G2(YP+/PI-) | G3(PI+) |             |         |             |         | Mean<br>G2+G3 |
| Control       | 4.93        | 8.70    | 2.45        | 9.28    | 3.64        | 5.27    |             |         |             |         | 11.42         |
| 1µM           | 3.56        | 9.06    | 2.91        | 5.31    | 3.32        | 12.4    |             |         |             |         | 1.94          |
| 2.5µM         | 5.30        | 11.3    | 2.11        | 13.9    | 2.82        | 8.19    |             |         |             |         | 12.19         |
| 5µM           | 3.70        | 12.2    | 2.93        | 14.2    | 2.96        | 13.4    |             |         |             |         | 3.08          |
| 10µM          | 3.57        | 27.5    | 3.42        | 19.8    | 3.09        | 23.3    |             |         |             |         | 2.51          |
|               |             |         |             |         |             |         |             |         |             |         |               |
| PaTu8988T     |             |         |             |         |             |         |             |         |             |         |               |
|               | 1st         |         | 2nd         |         | 3rd         |         |             |         |             |         |               |
| Concentration | G2(YP+/PI-) | G3(PI+) | G2(YP+/PI-) | G3(PI+) | G2(YP+/PI-) | G3(PI+) |             |         |             |         | Mean<br>G2+G3 |
| Control       | 0.63        | 0.99    | 0.62        | 2.39    | 1.79        | 1.79    |             |         |             |         | 2.74          |
| 1µM           | 0.17        | 1.13    | 0.34        | 2.00    | 0.37        | 2.62    |             |         |             |         | 0.82          |
| 2.5µM         | 0.15        | 6.53    | 0.24        | 8.25    | 0.20        | 8.89    |             |         |             |         | 2.21          |
| 5µM           | 0.12        | 6.35    | 0.26        | 10.7    | 0.48        | 13.1    |             |         |             |         | 0.70          |
| 10µM          | 0.053       | 11.2    | 0.12        | 9.48    | 0.025       | 18.7    |             |         |             |         | 2.79          |
|               |             |         |             |         |             |         |             |         |             |         |               |
| SU.86.86      |             |         |             |         |             |         |             |         |             |         |               |
|               | 1st         |         | 2nd         |         | 3rd         |         |             |         |             |         |               |
| Concentration | G2(YP+/PI-) | G3(PI+) | G2(YP+/PI-) | G3(PI+) | G2(YP+/PI-) | G3(PI+) |             |         |             |         | Mean<br>G2+G3 |
| Control       | 1.75        | 4.01    | 1.8         | 5.89    | 1.62        | 5.69    |             |         |             |         | 6.92          |
| 1µM           | 0.70        | 4.26    | 0.77        | 3.28    | 1.15        | 3.08    |             |         |             |         | 0.83          |
| 2.5µM         | 1.27        | 4.76    | 0.97        | 4.96    | 1.31        | 6.13    |             |         |             |         | 4.41          |
| 5µM           | 1.43        | 9.14    | 0.86        | 12.1    | 1.91        | 13.7    |             |         |             |         | 0.39          |
|               |             |         |             |         |             |         |             |         |             |         |               |
| T3M4          |             |         |             |         |             |         |             |         |             |         |               |
|               | 1st         |         | 2nd         |         | 3rd         |         |             |         |             |         |               |
| Concentration | G2(YP+/PI-) | G3(PI+) | G2(YP+/PI-) | G3(PI+) | G2(YP+/PI-) | G3(PI+) |             |         |             |         | Mean<br>G2+G3 |
| Control       | 5.23        | 3.56    | 3.04        | 2.63    | 7.66        | 3.78    |             |         |             |         | 8.63          |
| 1µM           | 2.86        | 5.12    | 4.15        | 6.63    | 3.74        | 5.37    |             |         |             |         | 2.36          |
| 1.5µM         | 4.63        | 21.9    | 4.27        | 15.5    | 4.29        | 22.6    |             |         |             |         | 1.15          |
| 2.5µM         | 4.74        | 41.3    | 3.51        | 43.3    | 3.04        | 46.6    |             |         |             |         | 3.27          |
| 5µM           | 2.13        | 55.1    | 2.32        | 50.4    | 1.56        | 54.0    |             |         |             |         | 1.55          |
| 10µM          | 2.30        | 47.6    | 2.32        | 51.0    | 1.92        | 49.4    |             |         |             |         | 1.86          |

G2: Apoptosis  
G3: Necrosis  
G2+G3: Cell Deaths

Table S7 - Target Gene Expression (Log2(TPM+1))

|           | MK-2206     |             |             | Buparlisib    |               |               |               |
|-----------|-------------|-------------|-------------|---------------|---------------|---------------|---------------|
|           | <i>AKT1</i> | <i>AKT2</i> | <i>AKT3</i> | <i>PIK3CA</i> | <i>PIK3CB</i> | <i>PIK3CG</i> | <i>PIK3CD</i> |
| AsPc-1    | 6.25        | 4.32        | 0.00        | 4.57          | 5.86          | 0.00          | 0.26          |
| BxPc-3    | 7.38        | 5.41        | 2.79        | 4.28          | 4.87          | 0.85          | 2.00          |
| Capan-1   | 7.18        | 5.52        | 2.72        | 3.98          | 4.33          | 3.74          | 1.73          |
| Colo357   | 5.66        | 5.27        | 1.56        | 3.68          | 4.53          | 0.00          | 0.89          |
| Panc-1    | 8.20        | 9.68        | 4.23        | 4.97          | 5.97          | 0.00          | 3.54          |
| SU.86.86  | 7.05        | 7.32        | 4.75        | 4.23          | 4.44          | 1.08          | 3.13          |
| PaTu8988S | 7.26        | 4.80        | 0.07        | 4.47          | 5.28          | 0.00          | 0.24          |
| PaTu8988T | 6.94        | 4.66        | 5.67        | 4.42          | 4.61          | 0.10          | 3.48          |
| PaTu8902  | 7.16        | 4.77        | 5.76        | 4.37          | 4.94          | 0.00          | 3.11          |
| T3M4      | 6.23        | 4.91        | 2.45        | 4.29          | 3.73          | 0.00          | 1.73          |
| Control   | 5.13        | 5.13        | 1.52        | 1.52          | 3.10          | 0.12          | 1.08          |

Table S8 – MK-2206 Target Gene Variants in PDAC Cell Lines

| Cell line | #Chromosome | Start     | End       | Reference | Observed | Zygosities | Variant | Confidance | Variant Allele Frequency | Reading Depth | Gene | Base Change                | Animo Acin Change | Variant Type                           |
|-----------|-------------|-----------|-----------|-----------|----------|------------|---------|------------|--------------------------|---------------|------|----------------------------|-------------------|----------------------------------------|
| BxPc-3    | chr14       | 105241573 | 105241573 | G         | A        | het        | 473.77  |            | 34.7                     | 72            | AKT1 | NM_001014431.1:c.436-29C>T | -                 | intron_variant                         |
| PaTu8902  | chr14       | 105259122 | 105259122 | G         | A        | het        | 277.77  |            | 78.6                     | 14            | AKT1 | NM_001014431.1:c.-79-63C>T | -                 | intron_variant                         |
| PaTu8988T | chr14       | 105259122 | 105259122 | G         | A        | het        | 365.77  |            | 54.2                     | 24            | AKT1 | NM_001014431.1:c.-79-63C>T | -                 | intron_variant                         |
| PaTu8988S | chr14       | 105259122 | 105259122 | G         | A        | het        | 91.77   |            | 29.4                     | 17            | AKT1 | NM_001014431.1:c.-79-63C>T | -                 | intron_variant                         |
| SU.86.86  | chr19       | 40739770  | 40739770  | G         | A        | het        | 737.77  |            | 23.6                     | 254           | AKT2 | NM_001626.5:c.+9C>T        | -                 | 3_prime_UTR_variant                    |
| SU.86.86  | chr19       | 40748010  | 40748010  | G         | A        | het        | 2690.77 |            | 83.1                     | 124           | AKT2 | NM_001626.5:c.442-34C>T    | -                 | intron_variant                         |
| Panc-1    | chr1        | 243709052 | 243709052 | T         | C        | het        | 125.77  |            | 45.5                     | 11            | AKT3 | NM_005465.4:c.1164-153A>G  | -                 | intron_variant                         |
| PaTu8988S | chr1        | 243716481 | 243716494 | C         | CA       | het        | 22.64   |            | 66.7                     | 3             | AKT3 | NM_005465.4:c.949-237dupT  | -                 | intron_variant                         |
| PaTu8988S | chr1        | 243736210 | 243736225 | C         | CT       | het        | 22.1    |            | 41.7                     | 12            | AKT3 | NM_005465.4:c.819+17dupA   | -                 | splice region variant & intron variant |

Table S9 - Buparlisib Target Gene Variants in PDAC Cell Lines

| Cell line | #Chromosome | Start     | End       | Reference | Observed | Zygosity | Variant Confidence | Variant Allele Frequency | Reading Depth | Gene   | Base Change                                 | Amimo Acin Change          | Variant Type                               |
|-----------|-------------|-----------|-----------|-----------|----------|----------|--------------------|--------------------------|---------------|--------|---------------------------------------------|----------------------------|--------------------------------------------|
| Colo357   | chr3        | 178916504 | 178916504 | C         | G        | het      | 48.77              | 30                       | 10            | PIK3CA | NM_006218.2:c.-76-34C>G                     | -                          | intron_variant                             |
| Colo357   | chr3        | 178922374 | 178922374 | C         | G        | het      | 249.77             | 22.7                     | 88            | PIK3CA | NM_006218.2:c.1143C>G                       | NM_006218.2:p.Pro381Pro    | splice_region_variant & synonymous_variant |
| Colo357   | chr3        | 178937400 | 178937400 | A         | G        | het      | 461.77             | 28.9                     | 114           | PIK3CA | NM_006218.2:c.1788A>G                       | NM_006218.2:p.Glu596Glu    | synonymous_variant                         |
| Colo357   | chr3        | 178942268 | 178942273 | TATAT     | A        | hom      | 367.74             | 100                      | 24            | PIK3CA | NM_006218.2:c.2295-220.2295-216delTATATinsA | -                          | intron_variant                             |
| PaTu8988T | chr3        | 178942268 | 178942273 | TATAT     | A        | het      | 19.25              | 66.7                     | 3             | PIK3CA | NM_006218.2:c.2295-220.2295-216delTATATinsA | -                          | intron_variant                             |
| T3M4      | chr3        | 178917762 | 178917775 | CTT       | C        | het      | 16.85              | 44.4                     | 9             | PIK3CA | NM_006218.2:c.562+87_562+88delTT            | -                          | intron_variant                             |
| AsPc-1    | chr3        | 138430856 | 138430861 | AAAG      | A        | het      | 15.39              | 66.7                     | 6             | PIK3CB | NM_006219.2:c.1399+191_1399+193delICTT      | -                          | upstream_gene_variant                      |
| AsPc-1    | chr3        | 138456486 | 138456507 | AAT       | A        | het      | 40.47              | 25                       | 12            | PIK3CB | NM_006219.2:c.801+61_801+62delAT            | -                          | intron_variant                             |
| Panc-1    | chr3        | 138456486 | 138456507 | AAT       | A        | het      | 11.77              | 18.2                     | 11            | PIK3CB | NM_006219.2:c.801+61_801+62delAT            | -                          | intron_variant                             |
| Capan-1   | chr3        | 138383723 | 138383723 | G         | A        | het      | 132.77             | 55.6                     | 9             | PIK3CB | NM_006219.2:c.2672+155C>T                   | -                          | intron_variant                             |
| Colo357   | chr3        | 138423497 | 138423497 | T         | C        | het      | 28.77              | 28.6                     | 7             | PIK3CB | NM_006219.2:c.1531-162A>G                   | -                          | intron_variant                             |
| Colo357   | chr3        | 138425942 | 138425942 | T         | C        | het      | 446.77             | 70.4                     | 27            | PIK3CB | NM_006219.2:c.1530+59A>G                    | -                          | intron_variant                             |
| Colo357   | chr3        | 138456506 | 138456506 | T         | C        | het      | 179.77             | 64.7                     | 17            | PIK3CB | NM_006219.2:c.801+43A>G                     | -                          | intron_variant                             |
| SJ.86.86  | chr3        | 138474414 | 138474414 | G         | A        | hom      | 83.28              | 100                      | 3             | PIK3CB | NM_006219.2:c.397+182C>T                    | -                          | intron_variant                             |
| Capan-1   | chr7        | 106520052 | 106520052 | C         | G        | het      | 1756.77            | 52.9                     | 153           | PIK3CG | NM_001282426.1:c.2480C>G                    | NM_001282426.1:p.Thr827Arg | missense_variant                           |
| Colo357   | chr1        | 9779801   | 9779801   | T         | C        | het      | 12.06              | 66.7                     | 3             | PIK3CD | NM_005026.3:c.1243-178T>C                   | -                          | intron_variant                             |
| PaTu8902  | chr1        | 9770690   | 9770713   | CAGAGAG   | C        | het      | 36.47              | 26.7                     | 15            | PIK3CD | NM_005026.3:c.141+54_141+59delGAGAGA        | -                          | intron_variant                             |

Table S10 - *KRAS* Variants in PDAC Cell Lines

| Cell line | #Chromosome | Start    | End      | Reference | Observed | Zygositities | Variant Confidence | Variant Allele Frequency | Reading Depth | Gene        | Base Change          | Animo Acin Change      | Variant Type     |
|-----------|-------------|----------|----------|-----------|----------|--------------|--------------------|--------------------------|---------------|-------------|----------------------|------------------------|------------------|
| AsPc-1    | chr12       | 25398284 | 25398284 | C         | T        | hom          | 2219.77            | 100                      | 90            | <i>KRAS</i> | NM_033360.2:c.35G>A  | NM_033360.2:p.Gly12Asp | missense_variant |
| Capan-1   | chr12       | 25398284 | 25398284 | C         | A        | hom          | 1774.77            | 97.1                     | 70            | <i>KRAS</i> | NM_033360.2:c.35G>T  | NM_033360.2:p.Gly12Val | missense_variant |
| Colo357   | chr12       | 25398284 | 25398284 | C         | T        | het          | 403.77             | 23.8                     | 126           | <i>KRAS</i> | NM_033360.2:c.35G>A  | NM_033360.2:p.Gly12Asp | missense_variant |
| Panc-1    | chr12       | 25398284 | 25398284 | C         | T        | het          | 2675.77            | 62.1                     | 203           | <i>KRAS</i> | NM_033360.2:c.35G>A  | NM_033360.2:p.Gly12Asp | missense_variant |
| PaTu8902  | chr12       | 25398284 | 25398284 | C         | A        | hom          | 1052.77            | 100                      | 42            | <i>KRAS</i> | NM_033360.2:c.35G>T  | NM_033360.2:p.Gly12Val | missense_variant |
| PaTu8988T | chr12       | 25398284 | 25398284 | C         | A        | hom          | 1212.77            | 98                       | 49            | <i>KRAS</i> | NM_033360.2:c.35G>T  | NM_033360.2:p.Gly12Val | missense_variant |
| PaTu8988S | chr12       | 25398284 | 25398284 | C         | A        | hom          | 1541.77            | 96.9                     | 65            | <i>KRAS</i> | NM_033360.2:c.35G>T  | NM_033360.2:p.Gly12Val | missense_variant |
| SU.86.86  | chr12       | 25398284 | 25398284 | C         | T        | het          | 6018.77            | 83.7                     | 319           | <i>KRAS</i> | NM_033360.2:c.35G>A  | NM_033360.2:p.Gly12Asp | missense_variant |
| T3M4      | chr12       | 25380275 | 25380275 | A         | C        | het          | 709.77             | 32.6                     | 129           | <i>KRAS</i> | NM_033360.2:c.183A>C | NM_033360.2:p.Gln61His | missense_variant |

Table S11 - *TP53* Variants in PDAC Cell Lines

| Cell line | #Chromosome | Start   | End     | Reference | Observed | Zygosity | Variant Confidence | Variant Allele Frequency | Reading Depth | Gene        | Base Change           | Animo Acin Change       | Variant Type       |
|-----------|-------------|---------|---------|-----------|----------|----------|--------------------|--------------------------|---------------|-------------|-----------------------|-------------------------|--------------------|
| AsPc-1    | chr17       | 7578526 | 7578530 | CA        | C        | hom      | 3365.73            | 96.4                     | 110           | <i>TP53</i> | NM_000546.4:c.403delT | NM_000546.4:p.Cys135fs  | frameshift_variant |
| Panc-1    | chr17       | 7577120 | 7577120 | C         | T        | hom      | 1977.77            | 98.8                     | 81            | <i>TP53</i> | NM_000546.4:c.818G>A  | NM_000546.4:p.Arg273His | missense_variant   |
| BxPc-3    | chr17       | 7578190 | 7578190 | T         | C        | hom      | 2653.77            | 99                       | 103           | <i>TP53</i> | NM_000546.4:c.659A>G  | NM_000546.4:p.Tyr220Cys | missense_variant   |
| Capan-1   | chr17       | 7578454 | 7578454 | G         | A        | hom      | 2094.77            | 100                      | 83            | <i>TP53</i> | NM_000546.4:c.476C>T  | NM_000546.4:p.Ala159Val | missense_variant   |
| Colo357   | chr17       | 7579419 | 7579424 | AG        | A        | hom      | 4167.73            | 100                      | 130           | <i>TP53</i> | NM_000546.4:c.267delC | NM_000546.4:p.Ser90fs   | frameshift_variant |
| PaTu8902  | chr17       | 7577094 | 7577094 | G         | A        | hom      | 2250.77            | 100                      | 79            | <i>TP53</i> | NM_000546.4:c.844C>T  | NM_000546.4:p.Arg282Trp | missense_variant   |
| PaTu8988T | chr17       | 7577094 | 7577094 | G         | A        | hom      | 1503.77            | 100                      | 57            | <i>TP53</i> | NM_000546.4:c.844C>T  | NM_000546.4:p.Arg282Trp | missense_variant   |
| PaTu8988S | chr17       | 7577094 | 7577094 | G         | A        | hom      | 2498.77            | 100                      | 97            | <i>TP53</i> | NM_000546.4:c.844C>T  | NM_000546.4:p.Arg282Trp | missense_variant   |
| SU.86.86  | chr17       | 7573948 | 7573948 | C         | A        | hom      | 665.77             | 100                      | 24            | <i>TP53</i> | NM_000546.4:c.1079G>T | NM_000546.4:p.Gly360Val | missense_variant   |
| SU.86.86  | chr17       | 7577548 | 7577548 | C         | T        | hom      | 1415.77            | 100                      | 54            | <i>TP53</i> | NM_000546.4:c.733G>A  | NM_000546.4:p.Gly245Ser | missense_variant   |
| T3M4      | chr17       | 7578190 | 7578190 | T         | C        | hom      | 2061.77            | 100                      | 78            | <i>TP53</i> | NM_000546.4:c.659A>G  | NM_000546.4:p.Tyr220Cys | missense_variant   |

Table S12 - Gene expression *KRAS* (Log2(TPM+1))

|           | <i>KRAS</i> Expression |
|-----------|------------------------|
| AsPc-1    | 4.79                   |
| BxPc-3    | 4.53                   |
| Capan-1   | 4.40                   |
| Colo357   | 4.16                   |
| Panc-1    | 6.11                   |
| PaTu8902  | 4.51                   |
| PaTu8988S | 4.65                   |
| PaTu8988T | 4.46                   |
| SU.86.86  | 7.09                   |
| T3M4      | 5.79                   |
| Control   | 2.14                   |

Table S13 - Gene expression *TP53* (Log2(TPM+1))

|           | <i>TP53</i> Expression |
|-----------|------------------------|
| AsPc-1    | 1.24                   |
| BxPc-3    | 5.42                   |
| Capan-1   | 4.39                   |
| Colo357   | 2.13                   |
| Panc-1    | 5.29                   |
| PaTu8902  | 5.37                   |
| PaTu8988S | 5.35                   |
| PaTu8988T | 5.34                   |
| SU.86.86  | 4.61                   |
| T3M4      | 5.26                   |
| Control   | 2.83                   |
